# Supplementary material for: Magnetic Resonance Imaging-Related Anatomic and Functional Parameters for the Diagnosis and Prognosis of Chiari Malformation Type I: A Systematic Review and Meta-analysis
Source: PubMed Central journal article supplement — Neurospine. 2024 Jun 30;21(2):510–24. doi: 10.14245/ns.2347150.575 (PMC11224727; doi:10.14245/ns.2347150.575), 2024-06-30
Supplement: ns-2347150-575-Supplementary-Fig-1.pdf [file ns-2347150-575-Supplementary-Fig-1.pdf]

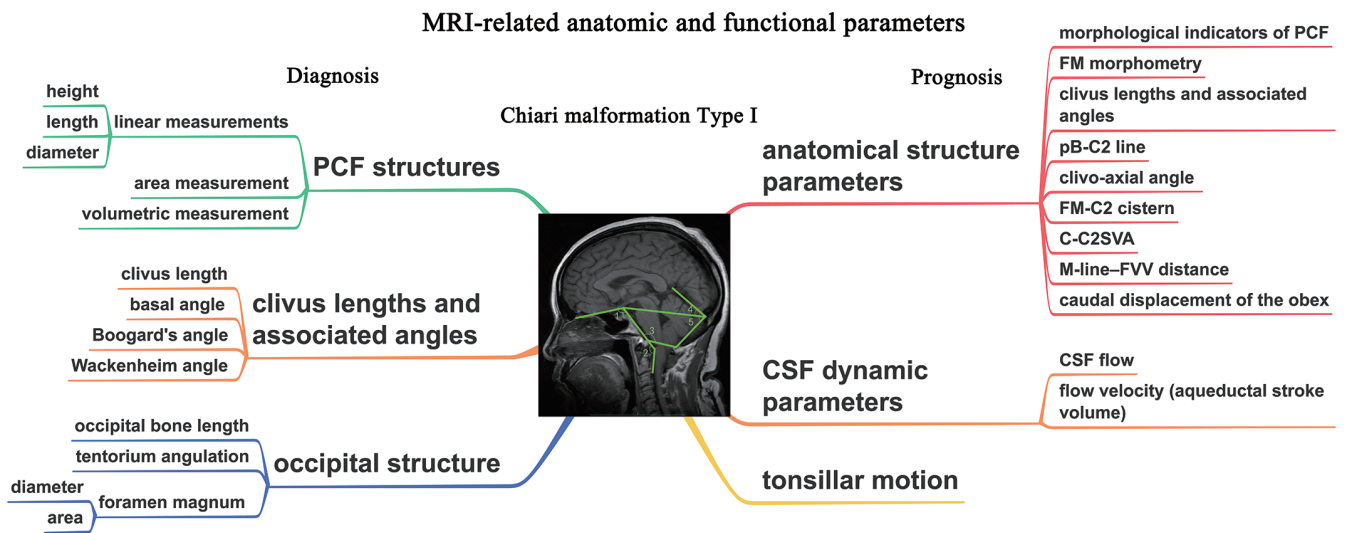

**Supplementary Fig. 1.** MRI-related anatomic and functional parameters for evaluating the diagnosis and prognosis of Chiari malformation type I. MRI, magnetic resonance imaging; PCF, posterior cranial fossa; CSF, cerebrospinal fluid; FM, foramen magnum; C-C2SVA, condylar-C2 sagittal vertical alignment; pB-C2, perpendicular to the basion to C2 line; FM-C2, foramen magnum-C2; FVV, fourth ventricle vertex.
