# Supplementary material for: Magnetic Resonance Imaging-Related Anatomic and Functional Parameters for the Diagnosis and Prognosis of Chiari Malformation Type I: A Systematic Review and Meta-analysis
Source: PubMed Central journal article supplement — Neurospine. 2024 Jun 30;21(2):510–24. doi: 10.14245/ns.2347150.575 (PMC11224727; doi:10.14245/ns.2347150.575), 2024-06-30
Supplement: ns-2347150-575-Supplementary-Fig-2.pdf [file ns-2347150-575-Supplementary-Fig-2.pdf]

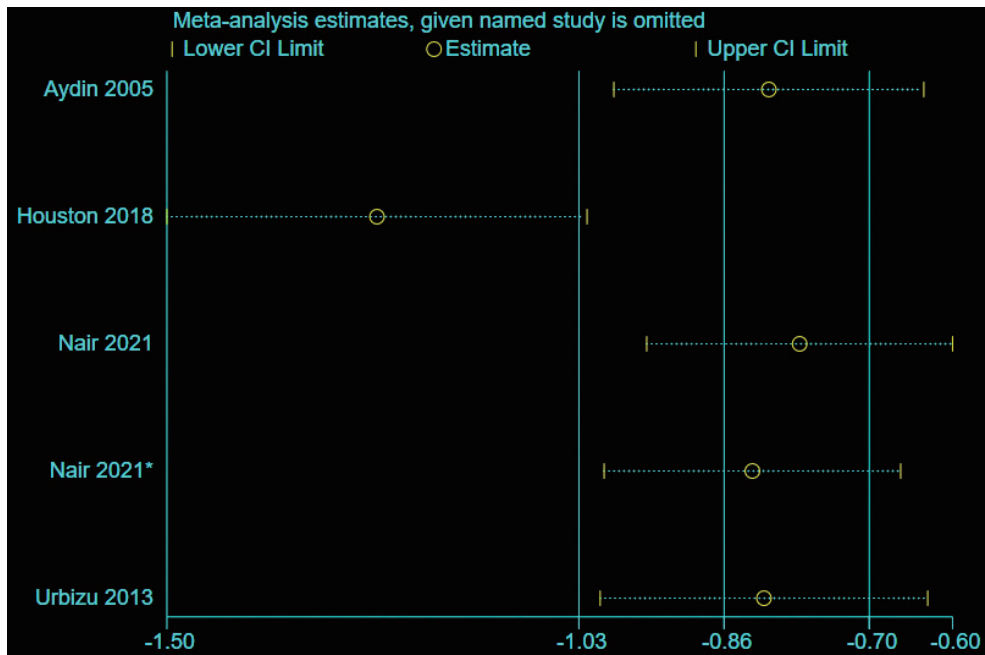

**Supplementary Fig. 2.** Sensitivity analysis of heterogeneity about the result of posterior cranial fossa height. CI, confidence interval.
