# Supplementary material for: Magnetic Resonance Imaging-Related Anatomic and Functional Parameters for the Diagnosis and Prognosis of Chiari Malformation Type I: A Systematic Review and Meta-analysis
Source: PubMed Central journal article supplement — Neurospine. 2024 Jun 30;21(2):510–24. doi: 10.14245/ns.2347150.575 (PMC11224727; doi:10.14245/ns.2347150.575), 2024-06-30
Supplement: ns-2347150-575-Supplementary-Table-1.pdf [file ns-2347150-575-Supplementary-Table-1.pdf]

**Supplementary Table 1.** Risk of bias assessments of the included studies using the ROBINS-I tool

| Study                                    | Bias due to confounding | Bias in selection of participants into the study | Bias in classification of interventions | Bias due to deviations from intended interventions | Bias due to missing data to missing data | Bias in measurement of outcomes | Bias in selection of the reported results | Overall bias |
|------------------------------------------|-------------------------|--------------------------------------------------|-----------------------------------------|----------------------------------------------------|------------------------------------------|---------------------------------|-------------------------------------------|--------------|
| Karagöz et al. <sup>7</sup> 2002         | Low                     | Low                                              | Low                                     | Low                                                | Low                                      | Low                             | Low                                       | Low          |
| Milhorat et al. <sup>8</sup> 2010        | Low                     | Low                                              | Low                                     | Low                                                | Low                                      | Low                             | Low                                       | Low          |
| Alperin et al. <sup>9</sup> 2014         | Low                     | Low                                              | Low                                     | Low                                                | Low                                      | Low                             | Low                                       | Low          |
| Aydin et al. <sup>10</sup> 2005          | Moderate                | Low                                              | Low                                     | Low                                                | Low                                      | Moderate                        | Low                                       | Moderate     |
| Urbizu et al. <sup>11</sup> 2014         | Low                     | Low                                              | Low                                     | Low                                                | Low                                      | Low                             | Low                                       | Low          |
| Krishna et al. <sup>12</sup> 2016        | Low                     | Low                                              | Low                                     | Low                                                | Critical                                 | Low                             | Low                                       | Critical     |
| Milhorat et al. <sup>13</sup> 2009       | Low                     | Low                                              | Low                                     | Low                                                | Low                                      | Low                             | Low                                       | Low          |
| Dufton et al. <sup>14</sup> 2011         | Moderate                | Low                                              | Low                                     | Low                                                | Low                                      | Low                             | Low                                       | Moderate     |
| Heiss et al. <sup>15</sup> 2012          | Moderate                | Low                                              | Low                                     | Low                                                | Low                                      | Low                             | Low                                       | Moderate     |
| Houston et al. <sup>16</sup> 2018        | Moderate                | Low                                              | Low                                     | Low                                                | Moderate                                 | Low                             | Low                                       | Moderate     |
| Nair and Rajshekhchar <sup>17</sup> 2022 | Moderate                | Low                                              | Low                                     | Low                                                | Low                                      | Moderate                        | Low                                       | Moderate     |
| Nishikawa et al. <sup>18</sup> 2022      | Low                     | Low                                              | Low                                     | Low                                                | Low                                      | Low                             | Low                                       | Low          |
| Wang et al. <sup>19</sup> 2014           | Low                     | Low                                              | Low                                     | Low                                                | Low                                      | Low                             | Low                                       | Low          |
| Yan et al. <sup>20</sup> 2016            | Low                     | Low                                              | Low                                     | Low                                                | Low                                      | Low                             | Low                                       | Low          |
| Yuksel et al. <sup>21</sup> 2022         | Low                     | Low                                              | Low                                     | Low                                                | Low                                      | Low                             | Low                                       | Low          |
| Tubbs et al. <sup>22</sup> 2003          | Low                     | Low                                              | Low                                     | Low                                                | Low                                      | Moderate                        | Low                                       | Moderate     |
| Besachio et al. <sup>23</sup> 2015       | Moderate                | Low                                              | Low                                     | Low                                                | Low                                      | Low                             | Low                                       | Moderate     |

ROBINS-I, Risk Of Bias In Non-randomised Studies - of Interventions.
